# Supplementary material for: Novel anticoagulants versus vitamin K antagonists for cardioversion of non- valvular atrial fibrillation – a meta-analysis of more than 17000 patients
Source: PubMed Central journal article supplement (PMC6395612; doi:10.1038/s41598-019-39925-5), 2019-02-28
Supplement: 41598_2019_39925_MOESM1_ESM.pdf [file 41598_2019_39925_MOESM1_ESM.pdf]

**Novel anticoagulants versus vitamin K antagonists for cardioversion of non- valvular atrial fibrillation – a meta-analysis of more than 17000 patients**

**Supplementary Material**

Raluca I. Mincu, PhD<sup>1</sup>, Amir A. Mahabadi, MD<sup>1</sup>, Matthias Totzeck, MD<sup>1</sup>, Tienush Rassaf, MD<sup>1\*</sup>

<sup>1</sup>West German Heart and Vascular Center, Department of Cardiology and Vascular Medicine, University Hospital Essen, Essen, Germany

\*Corresponding author:

Tienush Rassaf, MD

West German Heart and Vascular Center

Department for Cardiology and Vascular Medicine

University Hospital Essen

Hufelandstr. 55, 45147 Essen, Germany

Tel.: +49 201 723 4801

Fax: +49 201 723 5401

E-mail: [Tienush.Rassaf@uk-essen.de](mailto:Tienush.Rassaf@uk-essen.de)

**Supplementary Table 1. Characteristics of the included studies**

| Study             | Acronym of the study | Year of publication | Study type                              | Sample size | Study drug                                 | Number of patients or cardioversions (CV) in each arm | Median age | % males | Median follow-up |
|-------------------|----------------------|---------------------|-----------------------------------------|-------------|--------------------------------------------|-------------------------------------------------------|------------|---------|------------------|
| Nagarakanti et al | RE-LY                | 2011                | Post-hoc analysis of an open label RCT  | 1270        | Dabigatran 110 mg                          | 647 CV                                                | NR         | NR      | 30 days          |
|                   |                      |                     |                                         |             | Dabigatran 150 mg                          | 672 CV                                                | NR         | NR      |                  |
|                   |                      |                     |                                         |             | Warfarin (target INR = 2.5)                | 664 CV                                                | NR         | NR      |                  |
| Piccini et al     | ROCKET-AF            | 2013                | Post-hoc analysis of a double blind RCT | 321         | Rivaroxaban 20 mg or 15 mg                 | 160                                                   | 68         | 66      | 30 days          |
|                   |                      |                     |                                         |             | warfarin (target INR = 2.5)                | 161                                                   | 71         | 59      |                  |
| Flaker et al      | ARISTOTLE            | 2014                | Post-hoc analysis of a double blind RCT | 540         | Apixaban 5 mg or 2.5 mg                    | 265                                                   | 67         | 73      | 30 days          |
|                   |                      |                     |                                         |             | warfarin (target INR = 2.5)                | 275                                                   | 67         | 72      |                  |
| Capatto et al     | X-VeRT               | 2014                | Open label RCT IIIb                     | 1504        | Rivaroxaban 20 mg or 15 mg                 | 978                                                   | 64         | 72      | 30 days          |
|                   |                      |                     |                                         |             | warfarin or another VKA (target INR = 2.5) | 492                                                   | 64         | 73      |                  |
| Plitt et al       | ENGAGE-AF            | 2016                | RCT Double                              | 365         | Edoxaban                                   | 251                                                   | 70         | NR      | 30 days          |

|                   |         |      |                                                                    |      |                                |      |    |    |          |
|-------------------|---------|------|--------------------------------------------------------------------|------|--------------------------------|------|----|----|----------|
|                   | TIMI 48 |      | blind, double dummy                                                |      | 60/30 mg or Edoxaban 30/15 mg) |      |    |    |          |
|                   |         |      |                                                                    |      | Warfarin (target INR = 2.5)    | 114  | 72 | NR |          |
| Goette et al      | ENSURE  | 2016 | multicentre, prospective, randomised, open-label, blinded-endpoint | 2199 | edoxaban 60 mg or 30 mg        | 1095 | 64 | 66 | 58 days  |
|                   |         |      |                                                                    |      | warfarin (target INR = 2-3)    | 1104 | 64 | 65 |          |
| Ezekowitz et al   | EMANATE | 2017 | randomized, prospective, open-label                                | 1500 | Apixaban 5 mg or 2.5 mg        | 753  | NR | NR | 30 days  |
|                   |         |      |                                                                    |      | warfarin (target INR = 2-3)    | 747  | NR | NR |          |
| Kochhäuser et al  | none    | 2014 | Retrospective cohort                                               | 900  | Dabigatran 150 or 110 mg       | 288  | 65 | 63 | 6 months |
|                   |         |      |                                                                    |      | Rivaroxaban 20 or 15 mg        | 141  | 62 | 63 |          |
|                   |         |      |                                                                    |      | VKAs (target INR = 2-3)        | 471  | 68 | 64 |          |
| Pallisgaard et al | none    | 2015 | Retrospective cohort                                               | 1230 | Dabigatran 150 or 110 mg       | 456  | 66 | 72 | 28 weeks |
|                   |         |      |                                                                    |      | Warfarin (target INR = 2-3)    | 774  | 67 | 73 |          |
| Coleman et al     | none    | 2015 | Retrospective cohort                                               | 4647 | Dabigatran 150 or 110 mg       | 719  | 64 | 77 | 8 weeks  |
|                   |         |      |                                                                    |      | Rivaroxaban 20 or 15 mg        | 159  | 66 | 77 |          |

|                   |      |      |                    |      |                             |      |    |    |         |
|-------------------|------|------|--------------------|------|-----------------------------|------|----|----|---------|
|                   |      |      |                    |      | Apixaban 5 or 2.5 mg        | 48   | 66 | 75 |         |
|                   |      |      |                    |      | Warfarin (target INR = 2-3) | 3721 | 67 | 68 |         |
| Frederiksen et al | none | 2017 | Prospective cohort | 2150 | NOACs                       | 684  | NR | NR | 60 days |
|                   |      |      |                    |      | Warfarin (target INR = 2-3) | 1466 | NR | NR |         |

**Supplementary Table 2. PRISMA checklist**

| Section/topic             | #  | Checklist item                                                                                                                                                                                                                                                                                              | Reported on page # |
|---------------------------|----|-------------------------------------------------------------------------------------------------------------------------------------------------------------------------------------------------------------------------------------------------------------------------------------------------------------|--------------------|
| <b>TITLE</b>              |    |                                                                                                                                                                                                                                                                                                             |                    |
| Title                     | 1  | Identify the report as a systematic review, meta-analysis, or both.                                                                                                                                                                                                                                         | 1                  |
| <b>ABSTRACT</b>           |    |                                                                                                                                                                                                                                                                                                             |                    |
| Structured summary        | 2  | Provide a structured summary including, as applicable: background; objectives; data sources; study eligibility criteria, participants, and interventions; study appraisal and synthesis methods; results; limitations; conclusions and implications of key findings; systematic review registration number. | 2                  |
| <b>INTRODUCTION</b>       |    |                                                                                                                                                                                                                                                                                                             |                    |
| Rationale                 | 3  | Describe the rationale for the review in the context of what is already known.                                                                                                                                                                                                                              | 3,4                |
| Objectives                | 4  | Provide an explicit statement of questions being addressed with reference to participants, interventions, comparisons, outcomes, and study design (PICOS).                                                                                                                                                  | 3,4                |
| <b>METHODS</b>            |    |                                                                                                                                                                                                                                                                                                             |                    |
| Protocol and registration | 5  | Indicate if a review protocol exists, if and where it can be accessed (e.g., Web address), and, if available, provide registration information including registration number.                                                                                                                               | 2, 12              |
| Eligibility criteria      | 6  | Specify study characteristics (e.g., PICOS, length of follow-up) and report characteristics (e.g., years considered, language, publication status) used as criteria for eligibility, giving rationale.                                                                                                      | 12-15              |
| Information sources       | 7  | Describe all information sources (e.g., databases with dates of coverage, contact with study authors to identify additional studies) in the search and date last searched.                                                                                                                                  | 12, Figure 1       |
| Search                    | 8  | Present full electronic search strategy for at least one database, including any limits used, such that it could be repeated.                                                                                                                                                                               | 12,13              |
| Study selection           | 9  | State the process for selecting studies (i.e., screening, eligibility, included in systematic review, and, if applicable, included in the meta-analysis).                                                                                                                                                   | 12,13, Figure 1    |
| Data collection process   | 10 | Describe method of data extraction from reports (e.g., piloted forms, independently, in duplicate) and any processes for obtaining and confirming data from investigators.                                                                                                                                  | 13,14              |

|                                    |    |                                                                                                                                                                                                                        |                                   |
|------------------------------------|----|------------------------------------------------------------------------------------------------------------------------------------------------------------------------------------------------------------------------|-----------------------------------|
| Data items                         | 11 | List and define all variables for which data were sought (e.g., PICOS, funding sources) and any assumptions and simplifications made.                                                                                  | 12-14<br>Supplementary Table 1    |
| Risk of bias in individual studies | 12 | Describe methods used for assessing risk of bias of individual studies (including specification of whether this was done at the study or outcome level), and how this information is to be used in any data synthesis. | 14-15,<br>Supplementary Figure 1  |
| Summary measures                   | 13 | State the principal summary measures (e.g., risk ratio, difference in means).                                                                                                                                          | 14, 15,<br>Supplementary Figure 1 |
| Synthesis of results               | 14 | Describe the methods of handling data and combining results of studies, if done, including measures of consistency (e.g., $I^2$ ) for each meta-analysis.                                                              | 14, 15                            |

| Section/topic                 | #  | Checklist item                                                                                                                                                                                           | Reported on page #                                |
|-------------------------------|----|----------------------------------------------------------------------------------------------------------------------------------------------------------------------------------------------------------|---------------------------------------------------|
| Risk of bias across studies   | 15 | Specify any assessment of risk of bias that may affect the cumulative evidence (e.g., publication bias, selective reporting within studies).                                                             | Supplementary Figure 1                            |
| Additional analyses           | 16 | Describe methods of additional analyses (e.g., sensitivity or subgroup analyses, meta-regression), if done, indicating which were pre-specified.                                                         | 14, 15                                            |
| <b>RESULTS</b>                |    |                                                                                                                                                                                                          |                                                   |
| Study selection               | 17 | Give numbers of studies screened, assessed for eligibility, and included in the review, with reasons for exclusions at each stage, ideally with a flow diagram.                                          | 5, Figure 1                                       |
| Study characteristics         | 18 | For each study, present characteristics for which data were extracted (e.g., study size, PICOS, follow-up period) and provide the citations.                                                             | Supplementary Table 1                             |
| Risk of bias within studies   | 19 | Present data on risk of bias of each study and, if available, any outcome level assessment (see item 12).                                                                                                | Supplementary Figure 1,<br>Supplementary Figure 2 |
| Results of individual studies | 20 | For all outcomes considered (benefits or harms), present, for each study: (a) simple summary data for each intervention group (b) effect estimates and confidence intervals, ideally with a forest plot. | 5-7, Figures 2-4,                                 |

|                             |    |                                                                                                                                                                                      |                                                |
|-----------------------------|----|--------------------------------------------------------------------------------------------------------------------------------------------------------------------------------------|------------------------------------------------|
| Synthesis of results        | 21 | Present results of each meta-analysis done, including confidence intervals and measures of consistency.                                                                              | 5-7                                            |
| Risk of bias across studies | 22 | Present results of any assessment of risk of bias across studies (see Item 15).                                                                                                      | Supplementary Figure 1, Supplementary Figure 2 |
| Additional analysis         | 23 | Give results of additional analyses, if done (e.g., sensitivity or subgroup analyses, meta-regression [see Item 16]).                                                                | 5-7                                            |
| <b>DISCUSSION</b>           |    |                                                                                                                                                                                      |                                                |
| Summary of evidence         | 24 | Summarize the main findings including the strength of evidence for each main outcome; consider their relevance to key groups (e.g., healthcare providers, users, and policy makers). | 8                                              |
| Limitations                 | 25 | Discuss limitations at study and outcome level (e.g., risk of bias), and at review-level (e.g., incomplete retrieval of identified research, reporting bias).                        | 10-11                                          |
| Conclusions                 | 26 | Provide a general interpretation of the results in the context of other evidence, and implications for future research.                                                              | 8-11                                           |
| <b>FUNDING</b>              |    |                                                                                                                                                                                      |                                                |
| Funding                     | 27 | Describe sources of funding for the systematic review and other support (e.g., supply of data); role of funders for the systematic review.                                           | 18                                             |

*From:* Moher D, Liberati A, Tetzlaff J, Altman DG, The PRISMA Group (2009). Preferred Reporting Items for Systematic Reviews and Meta-Analyses: The PRISMA Statement. PLoS Med 6(6): e1000097. doi:10.1371/journal.pmed1000097

For more information, visit: [www.prisma-statement.org](http://www.prisma-statement.org).

## Supplementary Figures

Supplementary Figure 1. The quality of the included studies as analysed per Cochrane Handbook's recommendation.

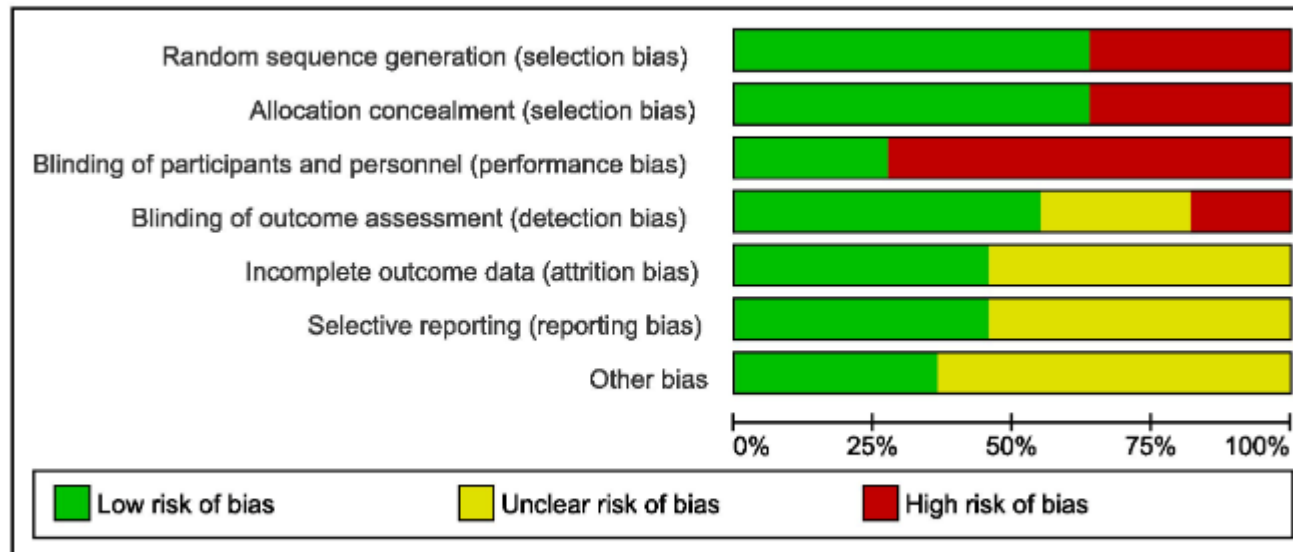



Supplementary Figure 2. Risk of bias for the studies included in the stroke and systemic embolism analysis.

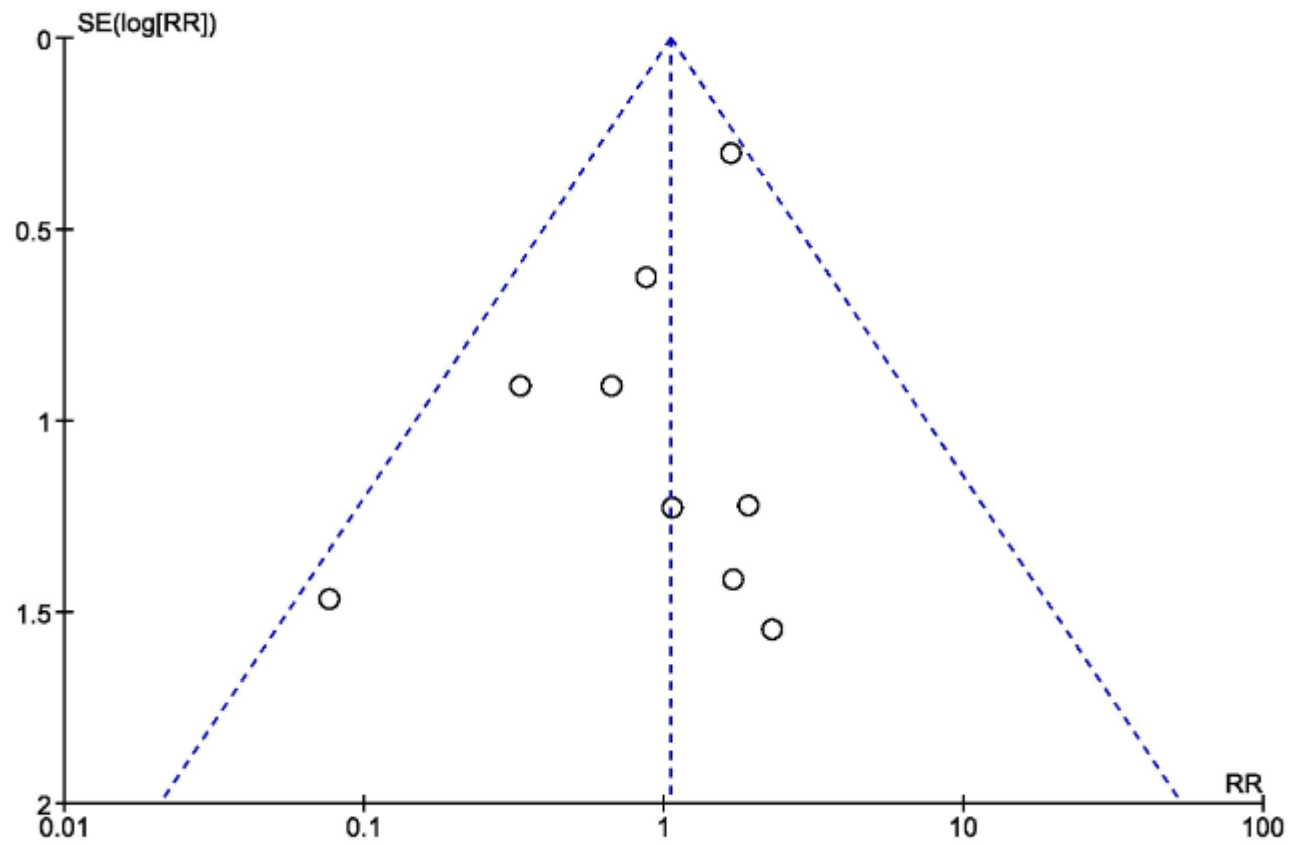

Supplementary Figure 3. Subgroup analysis of RR of stroke and systemic embolism based on the follow-up duration of each study.

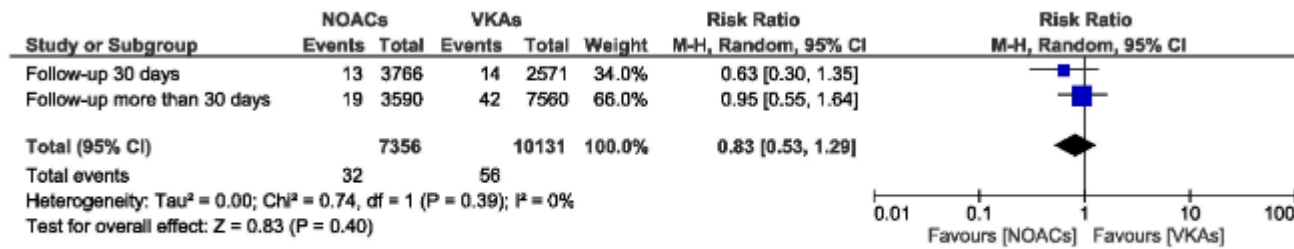

Parallelogram boxes denote the RR, and horizontal lines represent 95% confidence intervals. RR = Risk Ratio, NOACs = non-vitamin K antagonist oral anticoagulants, VKAs = vitamin K antagonists
